1  
2 **A modular plasmid toolkit applied in marine Proteobacteria reveals**  
3 **functional insights during bacteria-stimulated metamorphosis**

4  
5 **AUTHORS**

6 Amanda T. Alker<sup>1</sup>, Alpher E. Aspiras<sup>1</sup>, Tiffany L. Dunbar<sup>1</sup>, Morgan V. Farrell<sup>1</sup>, Andriy  
7 Fedoriouk<sup>1</sup>, Jeffrey E. Jones<sup>1</sup>, Sama R. Mikhail<sup>1</sup>, Gabriella Y. Salcedo<sup>1</sup>, Bradley S. Moore<sup>2</sup> and  
8 Nicholas J. Shikuma<sup>1</sup>#

9  
10 #Corresponding author: Nicholas J. Shikuma (nshikuma@sdsu.edu)

11  
12 **INSTITUTIONS**

13 **1** Department of Biology,  
14 San Diego State University, San Diego, CA 92182 USA

15  
16 **2** Center for Marine Biotechnology and Biomedicine, Scripps Institution of Oceanography,  
17 University of California, San Diego, La Jolla, CA 92093 USA

18

19 **ABSTRACT**

20 A conspicuous roadblock to studying marine bacteria for fundamental research and  
21 biotechnology is a lack of modular synthetic biology tools for their genetic manipulation. Here,  
22 we applied, and generated new parts for, a modular plasmid toolkit to study marine bacteria in  
23 the context of symbioses and host-microbe interactions. To demonstrate the utility of this  
24 plasmid system, we genetically manipulated the marine bacterium *Pseudoalteromonas*  
25 *luteoviolacea*, which stimulates the metamorphosis of the model tubeworm, *Hydroides elegans*.  
26 Using these tools, we quantified constitutive and native promoter expression, developed reporter  
27 strains that enable the imaging of host-bacteria interactions, and used CRISPR interference  
28 (CRISPRi) to knock down a secondary metabolite and a host-associated gene. We demonstrate  
29 the broader utility of this modular system for rapidly creating and iteratively testing genetic  
30 tractability by modifying marine bacteria that are known to be associated with diverse host-  
31 microbe symbioses. These efforts enabled the successful transformation of twelve marine strains  
32 across two Proteobacteria classes, four orders and ten genera. Altogether, the present study  
33 demonstrates how synthetic biology strategies enable the investigation of marine microbes and  
34 marine host-microbe symbioses with broader implications for environmental restoration and  
35 biotechnology.

## 36 INTRODUCTION

37 Marine bacteria are a valuable and currently under-utilized resource for environmental  
38 restoration (1–6) and bioprospecting (7, 8), especially considering their influence on  
39 biogeochemical cycles (9) and their vital role in evolution through symbioses with eukaryotes  
40 (10). While advances in metagenomic sequencing have enabled a deep exploration of microbial  
41 diversity and gene content (11, 12), genetic tools to explore functions in marine bacteria remain  
42 scarce.

43  
44 Effective genetic engineering approaches in model microbial species, such as *E. coli*, utilize  
45 standardized and modular cloning toolkits (13–19), which leverage aligned plasmid parts based  
46 on the ordered pairings of restriction site overhangs to enable innumerable mix-and-match  
47 plasmid assembly options. However, such modular genetic tools have not yet been applied to  
48 most marine bacterial species. Thus, adapting and applying standardized molecular cloning tools  
49 for studying marine bacteria can provide a framework for addressing functional questions for  
50 basic science and biotechnology.

51  
52 Marine Proteobacteria are of specific interest as targets for genetic tool development due to their  
53 ability to produce diverse bioactive metabolites (20), their prominent associations in aquatic  
54 microbiomes, and involvement in host-microbe symbioses (21–23). Alphaproteobacteria and  
55 Gammaproteobacteria, in particular, are the most abundant orders in the ocean (12) and are  
56 prominent members of the microbiomes of animals such as phytoplankton (12), tubeworms (21)  
57 and corals (24). However, the vast majority of environmental strains have not been interrogated

58 using a genetics approach, leaving our ability to manipulate marine microbes limited to a few  
59 representative strains.

60

61 Of particular interest as targets for genetic manipulation are marine *Pseudoalteromonas* species  
62 because they produce a number of bioactive secondary metabolites (8, 25–29) and are often  
63 found in association with marine invertebrates (30–36). *Pseudoalteromonas* species are known to  
64 engage in a transient symbiosis called bacteria-stimulated metamorphosis, whereby surface-  
65 bound bacteria promote the larval-to-juvenile life cycle transition in invertebrates such as  
66 tubeworms and corals (37, 38). *Pseudoalteromonas luteoviolacea* stimulates the metamorphosis  
67 of the tubeworm *Hydroides elegans* (39, 40) by producing syringe-like protein complexes called  
68 Metamorphosis-Associated Contractile structures (MACs). MACs stimulate tubeworm  
69 metamorphosis by injecting an effector protein termed Mif1 into tubeworm larvae (40–42).  
70 Genes encoding the MACs structure are found in the *P. luteoviolacea* genome as a gene cluster  
71 encoding structural components, such as the *macB* baseplate and *macS* sheath, as well as the  
72 protein effector gene *mif1* (41). Despite the significant insights gained by using genetics in *P.*  
73 *luteoviolacea*, new genetic tools are needed to further dissect the function of MACs and their  
74 stimulation of tubeworm metamorphosis.

75

76 In this work, we utilize a modular plasmid toolkit, and contribute new Marine Modification Kit  
77 (MMK) plasmid parts, to study bacteria-stimulated metamorphosis in the  
78 Gammaproteobacterium, *P. luteoviolacea*. We demonstrate the broader utility of this plasmid  
79 system by manipulating marine Alphaproteobacteria and Gammaproteobacteria that have been  
80 shown previously to be involved in diverse host-microbe interactions.

81

## 82 **RESULTS**

### 83 ***Toolkit-enabled quantitative promoter expression in *P. luteoviolacea*.***

84 To test the application of modular genetic tools in marine bacteria, we identified a set of  
85 preexisting parts from the Yeast Toolkit and Bee Toolkit platforms (17, 18) and used Golden  
86 Gate Assembly (14) for rapid, modular construction of plasmids (Figure 1A-C). Each type of  
87 part is defined by its functional role (e.g. promoter, coding sequence) and directional 4 bp  
88 overhangs generated by flanking Type IIS (BsaI) restriction sites. The modular parts include:  
89 Type-1 and Type-5 stage-2 connectors with BsmBI recognition sites (17, 18), a Type-2 promoter  
90 with ribosome binding site (RBS), a Type-3 protein coding sequence (CDS), a Type-4  
91 terminator, an optional Type-6 repressor and Type-7 promoter with RBS, and a Type-8  
92 backbone. For this work, we selected a broad-host-range (BHR) plasmid backbone containing a  
93 kanamycin resistance gene, a reporter coding sequence (fluorescent *gfp-optim1*, *mRuby* or  
94 *Nanoluciferase [Nluc]*), T7 terminator and a stage-2 assembly connector. The backbone has an  
95 RSF1010 origin of replication, known to replicate in a broad range of gram-positive and negative  
96 bacterial hosts (43). A promiscuous origin of transfer and plasmid-encoded conjugative  
97 machinery (44) enabled domestication-free conjugative transfer with MFD*pir* auxotrophic host  
98 *E. coli* cells (45).

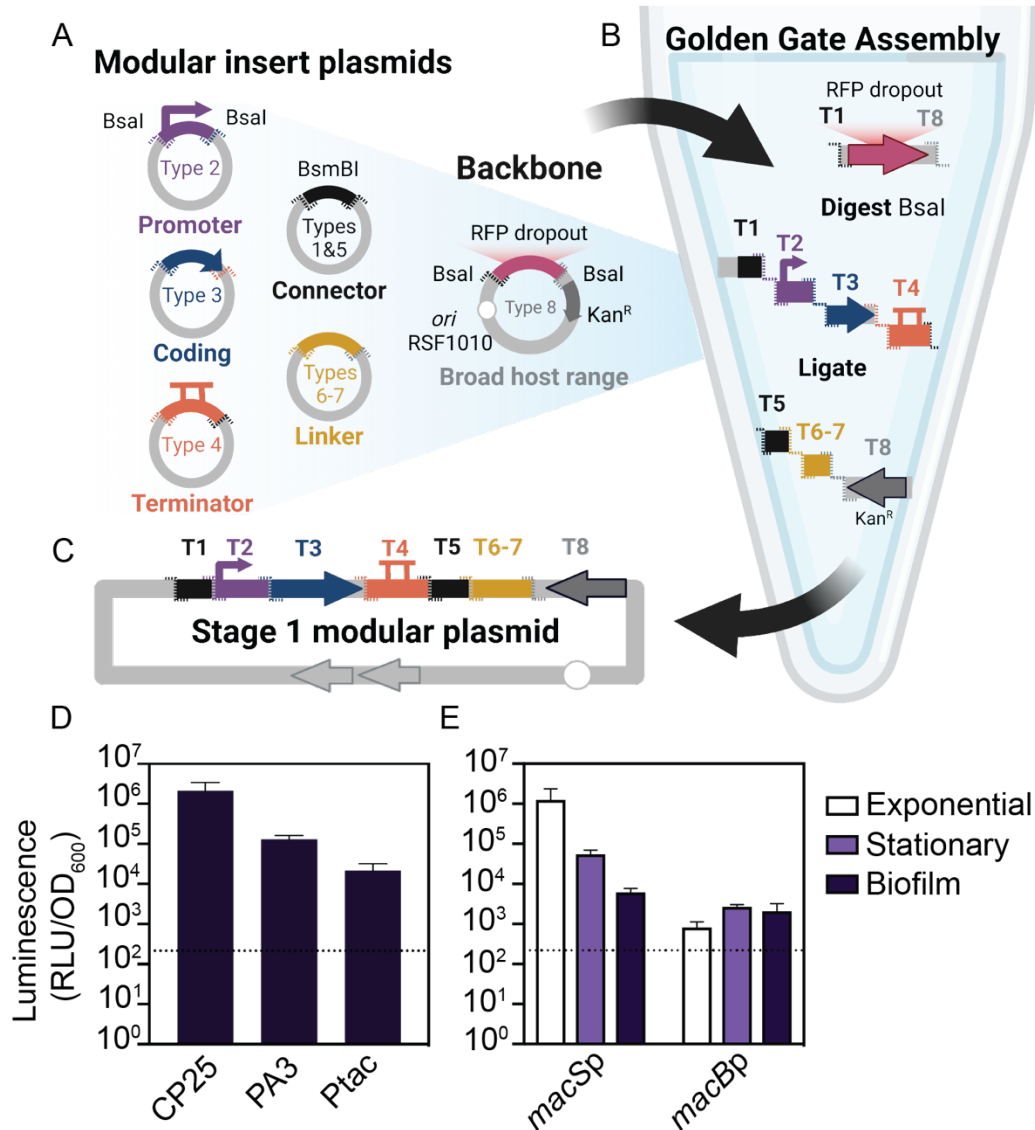

99

100 **Figure 1. Schematic overview of the modular plasmid system and quantitative**  
 101 **promoter measurements.** (A) Schematic representation of the modular golden gate  
 102 assembly plasmid parts with flanking BsaI cut sites (dashed lines). Overlapping 4 bp  
 103 overhangs are color coordinated. The modular broad host range (BHR) backbone  
 104 (pBTK402) contains inverted BsaI cut sites and an RFP dropout. (B) Golden Gate  
 105 Assembly is performed in a one-tube reaction by digesting the backbone and insert part  
 106 plasmids with BsaI and ligating with T4 ligase. (C) A modular stage-1 plasmid is  
 107 complete when all overlapping inserts are successfully assembled in order. (D) Biofilm  
 108 luciferase assay of *P. luteoviolacea* strains expressing plasmids with different constitutive  
 109 promoters driving a Nanoluciferase (*Nluc*) gene (CP25-*Nluc*-T7, PA3-*Nluc*-T7, Ptac-  
 110 *Nluc*-T7). Luminescence, as relative luminescence units (RLU), is normalized to optical  
 111 density at 600 nm (OD<sub>600</sub>) and plotted on a log base 10 scale. The dashed line indicates  
 112 the detection limit three standard deviations above the *P. luteoviolacea* (no plasmid)  
 113 control (Y= 214 RLU/OD<sub>600</sub>). Plotted is the mean of three biological replicates. Error  
 114 bars indicate standard deviations. (E) Luciferase assay comparing native MACs *macS*

115 and *macB* promoters linked with a *Nluc* coding sequence across different modes of  
116 growth. N=3 biological replicates. Error bars indicate standard deviations. The dashed  
117 line indicates the detection limit three standard deviations above the *P. luteoviolacea* (no  
118 plasmid) control (Y= 218 RLU/OD<sub>600</sub>).

119 To apply the modular genetic tools in a marine symbiosis model, we explored constitutive and  
120 native promoter expression in *P. luteoviolacea*. We assembled plasmids with one of five  
121 promoters fused to *Nluc* and conjugated the plasmids into *P. luteoviolacea*. We utilized two  
122 existing constitutive promoters, PA3 and CP25, previously shown to work in diverse bee gut  
123 microbes (17, 46, 47). We designed a Ptac LacO constitutive promoter part (pMMK201), which  
124 is a hybrid of the *lac* and *trp* promoters amplified from the pANT4 plasmid (48). When *P.*  
125 *luteoviolacea* with the plasmids were grown as a biofilm, we observed at least 10-fold more  
126 luminescence signal compared to the background with all constitutive promoters tested (Figure  
127 1D). The CP25 promoter exhibited a 10,000-fold increase in luminescence. We also constructed  
128 two native *P. luteoviolacea* promoters driving the expression of the MACs structural genes;  
129 promoters from the MACs sheath (*macS* promoter, pMMK203) and baseplate (*macB* promoter,  
130 pMMK202) genes. The *macSp* luciferase reporter strain was elevated 1,000-fold in exponential  
131 growth as compared to 100-fold in stationary and 10-fold in biofilm phase, when compared to  
132 the detection limit (Figure 1E). In contrast, the *macB*, baseplate promoter exhibited similar levels  
133 of luminescence among each phase, approximately 10-fold higher than the detection limit  
134 (Figure 1E).

136

### 137 ***Functional CRISPRi knockdown of secondary metabolite biosynthesis in P. luteoviolacea.***

138 While previous studies in *P. luteoviolacea* have used gene knockouts to interrogate gene  
139 function, these approaches are time consuming and low-throughput. We therefore tested whether  
140 *P. luteoviolacea* is amenable to gene knockdown via CRISPR interference (CRISPRi) (Figure

141 2A and B) (49, 50). As a proof-of-concept, we targeted the *vioA* gene that encodes a key enzyme  
142 in the biosynthesis of violacein (51), which gives *P. luteoviolacea* its characteristic purple  
143 pigment (Figure 2B). To facilitate assembly for and expression in *P. luteoviolacea*, we modified  
144 the BsmBI cut site in the dCas9 part plasmid to include the *bla* gene (pMMK601), thus also  
145 conferring resistance to ampicillin. We replaced the existing PA1 promoter with Ptac in the  
146 guide RNA part plasmid targeting *gfp* (pMMK602). An assembled plasmid containing dCas9  
147 and a single guide RNA (sgRNA) targeting the non-template strand of *vioA* (pMMK603) was  
148 conjugated into *P. luteoviolacea* resulting in the visible absence of the purple pigment associated  
149 with violacein production on the plate (Figure 2C). *P. luteoviolacea* with a sgRNA targeting *gfp*  
150 was included as a non-targeting control. A significant reduction of violacein production was  
151 observed between cultures of *P. luteoviolacea* strains expressing the *vioA* and *gfp* targeting  
152 CRISPRi plasmids ( $p=0.0007$ , Figure 2D). The lack of violacein in the *vioA* knockdown strain  
153 was comparable to that of a *P. luteoviolacea* strain with an in-frame deletion of *vioA* (Figure  
154 2D). These results demonstrate the successful implementation of CRISPRi for gene knockdown  
155 in *P. luteoviolacea*.

156



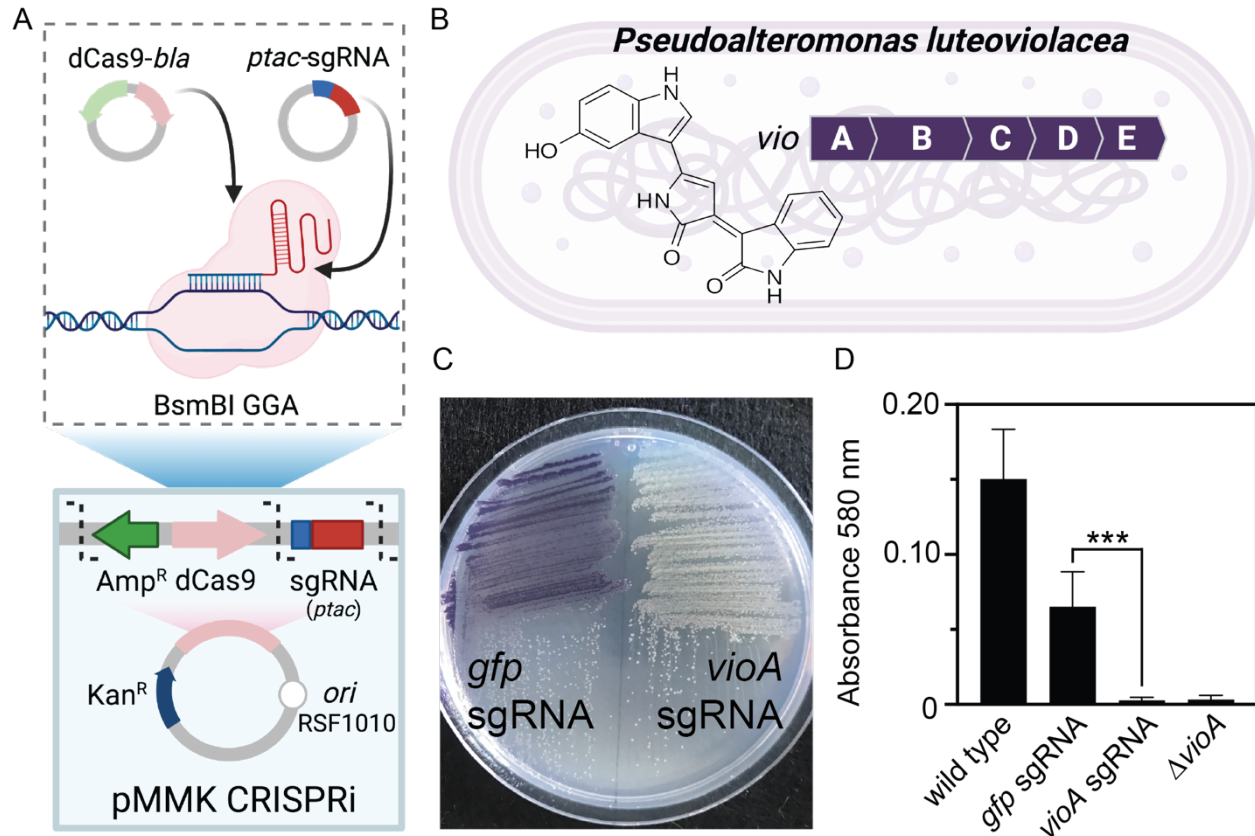

157

158 **Figure 2. CRISPRi knockdown of secondary metabolite production in *P.***  
159 ***luteoviolacea*.** (A) Schematic representation of modular CRISPRi parts adapted to  
160 include dCas9-*bla* and Ptac-sgRNA parts, pMMK601 and pMMK602, respectively. Part  
161 plasmids are combined and a Golden Gate Assembly was performed with BsmBI. (B)  
162 Schematic representation of the violacein genecluster *vioABCDE* in *P. luteoviolacea*  
163 and the violacein molecular structure. The CRISPRi system was assembled with an sgRNA  
164 targeting the *vioA* gene (pMMK603) and employed to knock down violacein production  
165 in *P. luteoviolacea*. (C) *P. luteoviolacea* with *gfp* (pMMK602) or *vioA* (pMMK603)  
166 sgRNA plasmids grown on marine agar plates. (D) Quantification of violacein production  
167 (measured at 580 nm) between *P. luteoviolacea* containing *gfp* or *vioA* sgRNA  
168 plasmids. Asterisks indicate significant differences (\*\*\*)  $p=0.0007$ , Dunnett's T3 multiple  
169 comparisons test). *P. luteoviolacea* wild type and  $\Delta$ *vioA* strains are included as controls.  
170 Bars represent the mean (N=8) and error bars indicate standard deviations.  
171

172 **Functional CRISPRi knockdown and visualization of *P. luteoviolacea* during a tubeworm-**

173 **microbe interaction.** We next tested whether CRISPRi would be functional in the context of a

174 marine host-microbe interaction by targeting the *macB* gene, which encodes the MACs

175 baseplate, an essential component of the MACs complex that induces tubeworm metamorphosis

176 (39, 40) (Figure 3A). Biofilm metamorphosis assays were performed comparing *P. luteoviolacea*  
177 strains with sgRNAs targeting *macB* (pMMK604) or a sgRNA targeting *gfp* as a control (Figure  
178 3B). The strain containing the *macB* sgRNA exhibited significantly reduced levels of tubeworm  
179 metamorphosis compared to the *gfp*-sgRNA control (Figure 3B; Mann Whitney test,  $p=0.029$ ).  
180 The reduction of metamorphosis stimulation in the *macB*-sgRNA knockdown strain was  
181 comparable to that of a *P. luteoviolacea* strain with an in-frame deletion of *macB* carrying the  
182 *gfp*-sgRNA control plasmid (Figure 3B). These results demonstrate that CRISPRi paired with a  
183 modular plasmid system is a viable tool for interrogating gene function during a marine host-  
184 microbe interaction.

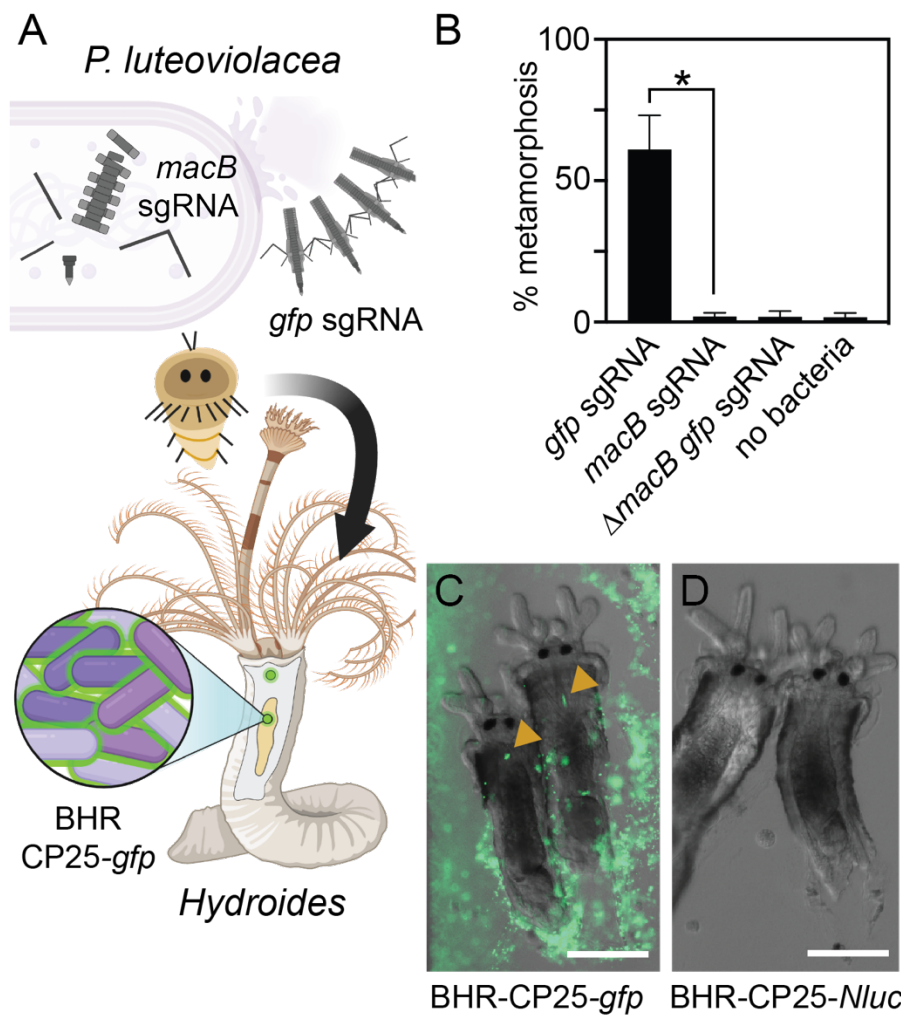

185

186 **Figure 3. Functional knockdown of MACs and visualization of *P. luteoviolacea***  
187 **during the tubeworm-microbe interaction.** (A) Schematic depicting *P. luteoviolacea*  
188 and the production of MACs, which induce tubeworm metamorphosis. CRISPRi single  
189 guide RNA (sgRNA) targeting the *macB* MACs baseplate gene prevents MACs from  
190 assembling, rendering the bacterium unable to induce metamorphosis. Cells that produce  
191 intact MACs are able to induce tubeworm metamorphosis. A strong fluorescent reporter  
192 strain (BHR-CP25-*gfp*) enabled visualization of live tubeworm-bacteria interaction. (B)  
193 Bar graph representing biofilm metamorphosis assays with *P. luteoviolacea* carrying a  
194 CRISPRi plasmid targeting *macB* or *gfp* and *Hydroides* tubeworms. A *P. luteoviolacea*  
195  $\Delta$ *macB* strain with a sgRNA targeting *gfp* and a treatment without bacteria (no bacteria)  
196 were included as controls. Biofilm concentrations were made with cells at OD<sub>600</sub> 0.2.  
197 Bars plotted are the average of 3 biological replicates (N=3) performed on separate  
198 occasions. Four technical replicates were performed for each treatment during each  
199 biological replicate, with each well containing 20-40 worms. Error bars indicate standard  
200 deviations. Statistical significance between treatments is indicated by an asterisk  
201 (\*p=0.029, Mann Whitney test). (C and D) Fluorescence micrographs of *Hydroides*  
202 *elegans* juveniles imaged 24 hours after the competent larvae were exposed to inductive  
203 biofilms of *P. luteoviolacea* containing plasmids with (C) CP25-*gfp* or (D) CP25-*Nluc*.  
204 Strains containing *Nluc* plasmids were used as a negative control to account for  
205 autofluorescence. Yellow arrows show accumulation of fluorescent bacteria in the  
206 *Hydroides* juvenile pharynx. Scale bar is 100  $\mu$ m.  
207

208 To date, bacteria have not been visualized during or after the stimulation of metamorphosis in  
209 *Hydroides*. To test whether marine bacteria harboring a toolkit plasmid are amenable to live cell  
210 imaging when in association with juvenile tubeworms, we created biofilms of *P. luteoviolacea*  
211 containing plasmids encoding CP25-*gfp*-T7 (*gfp*) or CP25-*Nanoluc*-T7 (*Nluc*) and added  
212 competent *Hydroides* larvae. After incubation for 24 hours, biofilms of *gfp*-expressing *P.*  
213 *luteoviolacea* were clearly observed when visualized by fluorescence microscopy (Figure 3C). *P.*  
214 *luteoviolacea* stimulated *Hydroides* metamorphosis while carrying a modular plasmid and  
215 fluorescent bacteria were observed being ingested by the *Hydroides* juveniles. Bacteria can be  
216 seen collecting in the pharynx (Figure 3C, yellow arrows), then moving in a peristaltic fashion  
217 toward the gut (Movie S1). In contrast, bacteria and their biofilms were difficult to visualize by  
218 light microscopy without fluorescent bacteria (Figure 3D). Taken together, the modular plasmid  
219 system enables live imaging and experimentation during a marine host-microbe interaction.

220

221 ***Genetic manipulation of diverse marine Proteobacteria.*** Given the success of genetic  
222 manipulation of *P. luteoviolacea*, we tested whether more diverse marine Proteobacteria are  
223 amenable to genetic manipulation via the modular genetic toolkit. To this end, we isolated or  
224 acquired representative bacteria that are known to engage in symbioses with marine plants or  
225 animals in the ocean (Figure 4A; Table S1). To enable genetic selection using antibiotics, we  
226 determined the minimum inhibitory concentration for each bacterial strain tested against  
227 kanamycin (Table S1). When conjugation was performed using the broad-host-range (RSF1010)  
228 plasmid backbone, CP25 promoter, *gfp* reporter and T7 terminator, we observed the expression  
229 of *gfp* in 12 marine strains across two proteobacterial classes, four orders and 10 genera (Figure  
230 4B). Eight of the strains were made tractable for the first time, including bacteria from  
231 *Pseudoalteromonas*, *Endozoicomonas*, *Cobetia*, *Shimia*, *Nereida*, *Leisingera*, and *Phaeobacter*  
232 genera (Figure 4B). Adaptations to the conjugation protocol and use of constitutive promoters  
233 driving *gfp* enabled visual confirmation of successful conjugation (Figure 4B, Methods).

234

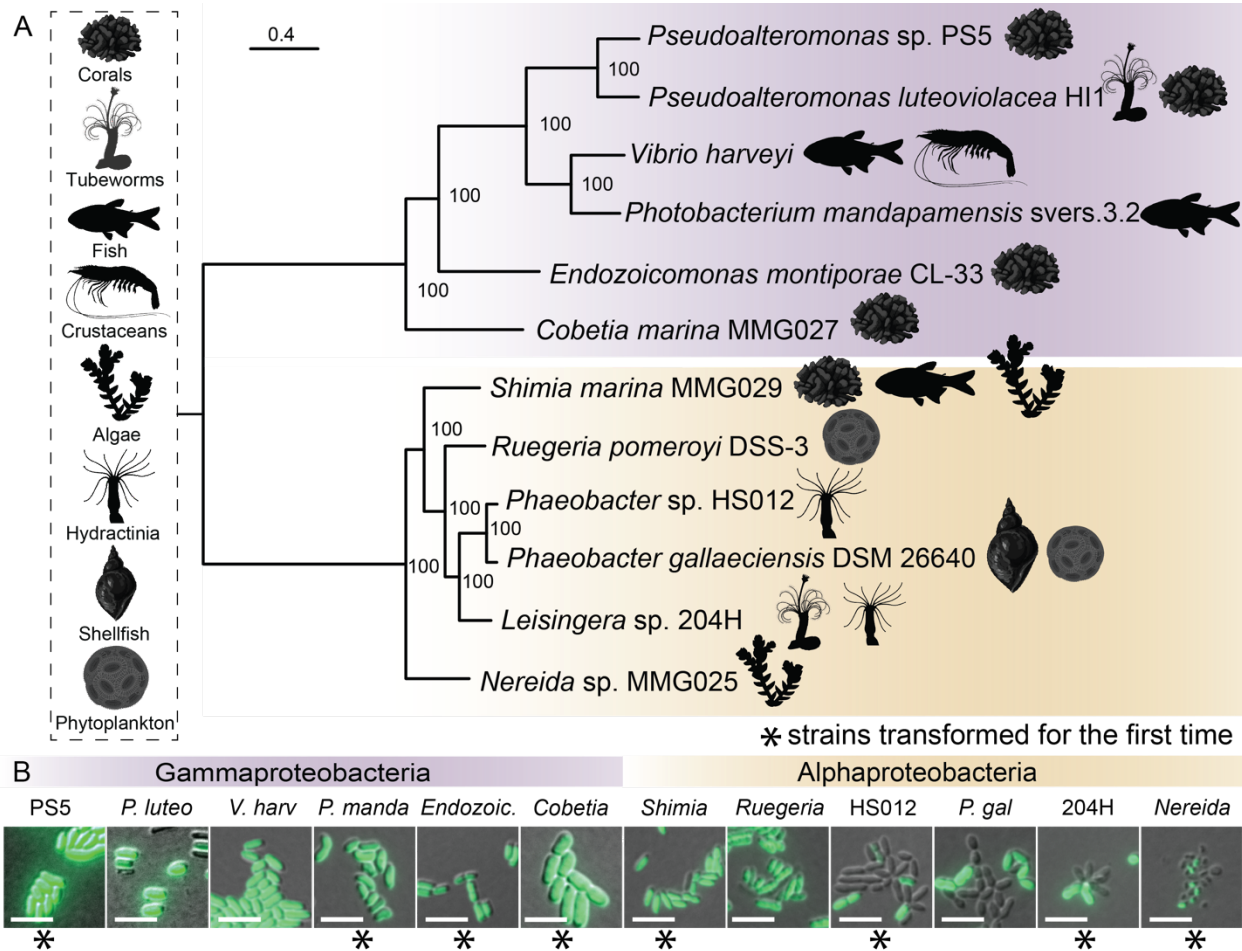

235  
236  
237  
238  
239  
240  
241  
242  
243  
244  
245  
246

**Figure 4. Diverse marine Proteobacteria are amenable to plasmid uptake and stable replication of toolkit plasmids.** (A) Maximum likelihood whole genome phylogeny of 12 strains selected for manipulation and successfully transformed in this study (52, 53). All strains used in this study are known for their interaction with a range of marine biota and the icons depicting their associated host are shown in the vertical box. Gammaproteobacteria strains are highlighted in purple and Alphaproteobacteria strains are shown in gold. Scale bar is 0.4 and bootstraps were generated using the rapid-bootstrapping method (54). The tree was rooted at the midpoint with FigTree (v1.4.4) (B) Fluorescence microscopy of overnight cultures containing constitutively expressed RSF1010 *ori* fluorescence vector (CP25-*gfp*-T7). Scale bar is 5  $\mu$ m.

247

248 **DISCUSSION**

249 ***Modular genetic tools provide insights about bacteria-stimulated metamorphosis.***

250 We tested a modular plasmid toolkit on a genetically tractable marine bacterium, *P.*  
251 *luteoviolacea*, that promotes the metamorphosis of the tubeworm *Hydroides elegans* (40, 41, 55)  
252 and produces several bioactive secondary metabolites (26, 29, 56, 57). We expand the tools  
253 available for functional interrogation of bacteria-stimulated metamorphosis in *P. luteoviolacea*  
254 by quantifying gene expression by a luminescence assay (Figure 1D and E), and using CRISPRi  
255 to knock down the secondary metabolite, violacein (Figure 2C and D), as well as a  
256 metamorphosis-associated gene, *macB* (Figure 3B) during the bacteria-tubeworm interaction.  
257 Distinct patterns of sheath (*macSp*) (41, 58) and baseplate (*macBp*) promoter induction suggest  
258 distinct mechanisms of gene regulation within the MACs gene cluster. Expression of the sheath  
259 gene was sensitive to bacterial mode of growth, while baseplate gene expression appeared static  
260 across the growth conditions tested. Although MACs are known to produce two effectors that  
261 stimulate tubeworm metamorphosis and kill eukaryotic cells (41, 58), the environmental  
262 conditions that promote MACs production remain poorly characterized. The tools developed  
263 here could help to characterize the conditions under which *P. luteoviolacea* MACs are produced  
264 or assembled and could help in the development of MACs or other contractile injection systems  
265 for use in biotechnology (59, 60). The modular tools in this work open new capabilities for  
266 interrogating bacterial biology, including the ability to quantify gene expression, knock down  
267 gene expression for rapid functional testing, and visualize bacteria during an *in vivo* interaction.  
268  
269 Whether, and how, bacteria and the animal are harmed or benefit from the interaction during  
270 bacteria-stimulated metamorphosis remains a prominent question in the field (38, 61, 62).

271 Previous work by Gosselin *et al.* have shown that *Hydroides* is able to feed on bacteria as the  
272 sole food source (63). But until the present work, live bacteria within the gut of *Hydroides*  
273 juveniles had not been observed (Figure 3C) (21). The visualization of transgenic bacteria in  
274 *Hydroides* will enable future lines of research that can help dissect the role of microbiome  
275 seeding in bacteria-stimulated metamorphosis. More broadly, our results showcase the feasibility  
276 of using a modular plasmid toolkit to test hypotheses about bacteria-stimulated metamorphosis,  
277 and provides a framework for the interrogation of other bacteria and their products that promote  
278 host-microbe symbioses (36, 64, 65).

279

#### 280 ***Toolkit compatibility in diverse Proteobacteria and their potential for future study.***

281 In this work, we explore genetic tractability and gene function in 12 ecologically relevant marine  
282 Proteobacteria. These strains belong to two Proteobacterial classes, half of which were  
283 transformed for the first time (Figure 4). In the *Phaeobacter*, *Leisingera* and *Nereida* strains,  
284 expression of *gfp* was not uniformly observed in all cells imaged. However, this plasmid toolkit  
285 could be used in the future to identify promoters with that would express reporter genes in a  
286 greater proportion of the population. Compatibility with the broad-host-range plasmid backbone  
287 (RSF1010 origin of replication) suggests that all strains may be amenable to further manipulation  
288 with other toolkit coding sequences including luminescence reporters, complementation and  
289 CRISPRi.

290

291 The Gammaproteobacteria strains transformed in this study are a diverse selection of symbiosis-  
292 associated strains representing five genera (Figure 4A). To our knowledge, this is the first report  
293 of genetic tractability in strains from the genera *Endozoicomonas* and *Cobetia* (Figure 4B).

294 *Endozoicomonas* species are among the most abundant bacterial symbionts in some corals and  
295 other marine hosts but are notoriously difficult to culture, therefore limiting our understanding of  
296 their functional roles in animal holobionts (66–68). Related strains of *Cobetia*, have been  
297 implicated in thermotolerance against bleaching in coral experiments with probiotic consortium  
298 treatments (69). The transformation of the representative *Endozoicomonas* and *Cobetia* strains in  
299 this study is a considerable step towards exploring function in coral host-microbiome interactions  
300 at a critical time to encourage the restoration of coral reefs (6, 70, 71). The genetic  
301 transformation of *Pseudoalteromonas* sp. PS5 in this study presents an opportunity to explore  
302 secondary metabolite production, including the coral metamorphosis-inducing compound,  
303 tetrabromopyrrole (Figure 4) (36). Other Gammaproteobacteria successfully transformed in this  
304 study include two bioluminescent strains, *Vibrio harveyi* and *Photobacterium mandapamensis*  
305 svers.3.2, which are associated with luminescence and organogenesis in squid (72, 73) and fish  
306 (74), respectively, but also as pathogens in aquaculture (75, 76) and corals (77, 78) (Figure 4A).  
307 In summary, the development of methods and established tractability of several new strains and  
308 genera have significant implications for the future of bacterial genetic development in  
309 established and emerging symbiosis systems.

310  
311 The Alphaproteobacteria strains tested in this study fall within the *Roseobacter* group (Figure  
312 4A), an ecologically important group of bacteria known to play a role in sulfur and carbon  
313 cycling on marine phytoplankton (79–81), in part due to their special capacity for lateral gene  
314 transfer and biofilm formation (82, 83). *Roseobacter* strains have also been explored as  
315 probiotics for the aquaculture industry (84–86). We explored the compatibility of the toolkit with  
316 the tractable, phytoplankton-associated species of *Phaeobacter gallaeciensis* (87), and *Ruegeria*



317 *pomeroyi* (88), and demonstrate transformation for the first time with invertebrate microbiome-  
318 associated strains *Phaeobacter* sp. HS012 (89) and *Leisingera* sp. 204H (90) (Figure 4). The  
319 tractability of bacteria within the genus *Shimia* sp. has not previously been explored prior to this  
320 study, which may be of interest for coral microbiome studies in simulating impacted  
321 environments (91–94). Furthermore, there are no previous reports of the genetic manipulation of  
322 species in the *Nereida* genus, which have been isolated from kelp (95) and are associated with  
323 gall formations (96, 97). Tractability in this strain could help guide further understanding of  
324 microbe-seaweed interactions (98, 99), kelp aquaculture and the development of kelp probiotics  
325 (100). Taken together, the framework used in this study to establish genetic tractability can be  
326 used in future studies to explore the function of marine *Roseobacter* species in a wide range of  
327 symbiosis systems from the environment.

328

## 329 **CONCLUSION**

330 The modular plasmid toolkit described here provides a basis for streamlining the genetic  
331 manipulation of marine bacteria for basic and applied purposes. These tools open up new  
332 possibilities to studying marine microbes in the context of plant and animal interactions, or with  
333 challenging and diverse non-model bacteria, ultimately helping us harness marine microbes for  
334 research, bioproduction and biotechnology.

335

## 336 MATERIALS AND METHODS

### 337 *Bacterial Culture*

338 A list of strains used in this study, isolation sources, accession numbers, and minimum inhibitory  
339 concentration can be found in Table S1. Environmental strains of marine bacteria were isolated  
340 and cultured on Marine Broth (MB) 2216 (BD Difco) and or natural seawater tryptone (NSWT)  
341 media (1 L 0.2  $\mu$ m filtered natural seawater from Scripps Pier, La Jolla, CA, 2.5 g Tryptone, 1.5  
342 g Yeast, 1.5 mL glycerol). MB and NSWT media are used interchangeably throughout the study;  
343 however, experiments were always conducted using only one media type. Marine bacteria were  
344 incubated between 25-30 °C, and cultures were shaken at 200 rpm. All liquid cultures were  
345 inoculated with a single colony and incubated between 16-18 hours, unless otherwise indicated.  
346 *E. coli* SM10*pir* and S17-1*pir* were cultured in LB (Miller, BD Difco) at 37 °C, shaking at 200  
347 rpm. *E. coli* MFD*pir* (45) was cultured in LB supplemented with 0.3 mM Diaminopimelic acid  
348 (DAP). For *E. coli*, antibiotic selections with ampicillin, kanamycin, chloramphenicol were  
349 performed using a concentration of 100  $\mu$ g/mL.

350

### 351 *Plasmid construction & Assembly*

352 Golden Gate Assembly-compatible parts from the BTK, YTK (17, 18) and MMK used in this  
353 work can be found in Table S2. New plasmid parts were made by PCR amplifying insert and  
354 backbone fragments and combining them with Gibson Assembly with a 2:1 ratio (insert:  
355 backbone) (101). PCR amplification was performed with custom primers (Table S3), a high-  
356 fidelity DNA polymerase (PrimeSTAR GXL, Takara) and purified using a DNA Clean and  
357 Concentrator kit (Zymo Research). Part plasmids were assembled to make a stage 1 plasmid  
358 using Golden Gate Assembly, with T4 DNA ligase (Promega) and either BsaI or BsmBI (New

359 England Biolabs), depending on the construct. Single-tube assembly was performed by running  
360 the following thermocycler program (BsaI/BsmBI): 37/42 °C for 5 minutes, 16 °C for 5 minutes,  
361 repeat 30x, 37/55 °C for 10 minutes, 80 °C for 10 minutes. The assemblies were directly  
362 electroporated into S17-1*pir* cells, confirmed by colony PCR (EconoTaq PLUS Green, LGC  
363 Biosearch) with internal primers and then shuttled to MFD*pir* cells for conjugation. The Ptac-  
364 sgRNA part plasmid with guide RNA was created to ensure expression of the sgRNA in *P.*  
365 *luteoviolacea*. To increase plasmid assembly efficacy, a BsmBI recognition site was moved to  
366 include the *bla* ampicillin resistance gene within the dCas9 part, enabling dual selection for  
367 positively assembled clones with kanamycin and ampicillin resistance. The CRISPRi assemblies  
368 were electroporated directly into SM10*pir* cells and shuttled to MFD*pir* cells for conjugation.

369

#### 370 *Biparental conjugation in marine bacteria*

371 *E. coli* donor strains (MFD*pir* or SM10*pir*) containing the mobilizable plasmids were grown  
372 under antibiotic selection in LB with the appropriate supplements (including 0.3 mM DAP for *E.*  
373 *coli* MFD*pir*). Conjugations were performed as previously described (17) with modifications for  
374 culturing marine bacteria. Briefly, several colonies of the recipient strains were inoculated and  
375 grown overnight in liquid culture. Recipient and donor cultures were spun down (4000 x g for 2  
376 minutes) in a 1:1 OD<sub>600</sub> ratio. All donor supernatant was removed leaving only the cell pellet. All  
377 but 100 µL of the recipient supernatant is removed and the cell pellet is resuspended. The  
378 recipient suspension is transferred to the donor pellet, which is resuspended with the recipient  
379 cells. Two 50 µL spots are plated onto NSW (supplemented with 0.3 mM DAP for MFD-  
380 mediated conjugations). Spots are resuspended in 500 µL of liquid marine media and 100 µL is  
381 plated onto marine media containing antibiotic selection, according to the minimum inhibitory

382 concentration (Table S1) Several of the bacteria take longer to grow or do not reach a high  
383 optical density (i.e. *Endozoicomonas*, *Ruegeria*, *Nereida*) in culture. Slower-growing marine  
384 bacteria were conjugated by growing larger 50 mL initial volumes of culture and spinning down  
385 the entire culture to reach 1:1 donor: host ratios.

386

### 387 *Phylogeny*

388 Strains or close representative strains used in this study were compiled into a genome group on  
389 PATRIC v3.6.12 (102). A whole genome phylogenetic codon tree composed of 100 single copy  
390 genes (103) was performed using the Phylogenetic Tree Service (104–106). A Maximum  
391 likelihood phylogeny was generated using the best protein model found by RaxMLv8.2.11 (107),  
392 which was LG. Bootstraps were generated using the rapid bootstrapping algorithm with the  
393 default of 100 resamples (54). The tree was visualized with FigTree v1.4.4. and was rooted at the  
394 mid-line.

395

### 396 *Luciferase Culture and Assay*

397 *P. luteoviolacea* containing plasmids with constitutive or native promoters driving  
398 *Nanoluciferase* (*Nluc*) were inoculated into 5 mL of MB or NSW media with appropriate  
399 antibiotics and grown at 25 °C at 200 rpm for 24 hours. Each biological replicate was represented  
400 by a separate culture. Cultures used for the growth phase assay were inoculated as a 1:100  
401 dilution with the appropriate antibiotic, and then incubated at 25 °C and shaking at 200 rpm. The  
402 luminescence of cultures was measured at exponential (OD<sub>600</sub> of 0.35-1.0), early stationary  
403 (OD<sub>600</sub> 1.0-1.45) or late stationary (OD<sub>600</sub> 2.38-2.54) phases. For biofilm cultures, 1.5 mL of  
404 stationary-phase culture was pelleted and plated as a single spot on NSW or MB plates. Biofilm

405 plates were incubated at 20-25 °C for 24-28 hours. Each spot was scraped with a pipette tip and  
406 resuspended in 200 µL of NSWT or MB media before being resuspended in NSWT or MB.  
407 Luciferase reactions were performed with 100 µL of bacterial culture or biofilm resuspension  
408 aliquoted into opaque white walled 96-well plates (Corning #3642), with a modified protocol as  
409 written for Promega Nano-Glo Live Cell Assay System (Promega cat#N2011). Briefly, bacteria  
410 and the final reagent mix were read at a 1:1 ratio. Luminescence was measured on a Molecular  
411 Devices Microplate FilterMax F5 reader with a custom program on the Softmax Pro 7 software.  
412 Readings were done on the kinetic luminescence mode at 2-minute intervals for 20 minutes in  
413 total, using a 400 ms integration time, a 1 mm height read, and no other optimization or shaking  
414 settings. The detection limit is defined as three standard deviations above nine biological and  
415 technical replicates of WT *P. luteoviolacea*. Raw data were normalized to the OD<sub>600</sub> of the  
416 culture used and plotted with an N=3 biological replicates.

417

#### 418 *Violacein extraction*

419 The specified *P. luteoviolacea* strains were struck onto NSWT media containing 200 µg/mL of  
420 streptomycin and kanamycin and incubated overnight at 25 °C. Single colonies were inoculated  
421 into 5 mL of liquid media containing the same antibiotic concentrations. Cultures were incubated  
422 at 25 °C, shaking at 200 rpm between 18 and 20 hours. Cultures were removed from the  
423 incubator and standardized to an OD<sub>600</sub> of 1.5. The cells were pelleted and the supernatant was  
424 removed. The cell pellet was resuspended in 200 µL of 100% ethanol. The resuspended cells  
425 were pelleted and the supernatant containing the crude extract was recorded on a Biotek Synergy  
426 HT plate reader (Vermont, USA) using the Gen5 program (v2.00.18) with an endpoint reading at  
427 580 nm.

428

429 *Microscopy*

430 Microscopy was performed using a Zeiss Axio Observer.Z1 inverted microscope equipped with  
431 an Axiocam 506 mono camera and Neofluar10x/0.3 Ph1/DICI (*Hydroïdes* co-cultures) or  
432 Apochromat 100x/1.4 Oil DICIII (bacteria only) objectives. The Zeiss HE eGFP filter set 38 was  
433 used to capture GFPoptim-1 expression and Zeiss HE mRFP filter set 63 was used to capture  
434 *mRuby2* expression. For *Nanoluciferase* controls, images were captured using the same  
435 fluorescence exposure times as the *gfp* optim-1 and *mRuby2* labeled strains of the same species.  
436 Bacterial culture (2 µL) were added to freshly prepared 1% saltwater low-melt agarose  
437 (Apex catalog #20-103, Bioreserch products) pads on glass slides and coverslips were placed on  
438 top. *Hydroïdes elegans* were prepared in visualization chambers (Lab-Tek Chambered  
439 Coverglasses catalog #155411PK) with bacteria and imaged.

440

441 *Hydroïdes elegans* culture

442 *Hydroïdes elegans* adults were collected from Quivira Basin, San Diego, California. The larvae  
443 were cultured and reared as previously described (40, 108). Larvae were maintained in beakers  
444 containing filtered artificial seawater (35 PSU) and were given new beakers with water changes  
445 daily. The larvae were fed live *Isochrysis galbana* and cultures were maintained as described  
446 previously. The larvae were used for metamorphosis assays once they reached competency  
447 (between 5 and 7 days old) (109).

448

449 *Hydroides elegans metamorphosis assays*

450 Biofilm metamorphosis assays were performed using previously described methods (39, 40,  
451 110). Briefly, bacteria were struck onto Marine Broth plates with 300 µg/mL kanamycin as  
452 appropriate and were incubated overnight at 25 °C. Up to 3 single colonies were inoculated into  
453 liquid broth and incubated overnight (between 15 and 18 hours), shaking at 200 rpm. Cultures  
454 were pelleted at 4000 g for 2 minutes, the spent media was removed and the cell pellets were  
455 washed twice with filtered artificial sea water (ASW). The concentration of the cells was diluted  
456 to OD<sub>600</sub> of 0.1 and four 100 µL aliquots of the cell concentrate were added to 96-well plates.  
457 The cells were given between 2 and 3 hours to form biofilms, then the planktonic cells were  
458 removed and the adhered cells were washed twice with filtered ASW. Between 20 and 40 larvae  
459 were added to each well in 100 µL of filtered ASW. Metamorphosis was scored after 24 hours.  
460 Three biological replicates were performed on different days using separate *Hydroides* larvae  
461 originating from different male and female animals.

462  
463 Chambered metamorphosis assays were performed using the same preparation principles as  
464 described above with the following modifications. Visualization chambers (Lab-Tek, Cat#  
465 155411) were used for setting up the metamorphosis assay, then subsequently imaged. Inductive  
466 strains containing constitutively expressed *gfp/mRuby/Nluc* plasmids were struck out onto MB  
467 media containing 300 µg/mL kanamycin. Several colonies were inoculated into 5 mL MB media  
468 with antibiotics. Cultures were grown for 18 hours and cells were washed and allowed to form  
469 biofilms as described above. Cell concentrations ranging between OD<sub>600</sub> 0.1 and 0.5 were used to  
470 elicit optimal metamorphosis. Larvae were concentrated and the resident filtered ASW was  
471 treated with 300 µg/mL kanamycin. Larvae were imaged 24 hours later.

472

473 *Online protocols*

474 Selected protocols used in this study can be accessed on the Shikuma Lab protocols.io page:

475 <https://www.protocols.io/workspaces/shikuma-lab-sdsu>

476

## 477 **ACKNOWLEDGEMENTS**

478 We thank current and former Shikuma Lab members that helped with cloning and providing  
479 feedback for this paper including Taylor Darby, Milagros Esmerode, Nicole Jacobson, and Dr.  
480 Kate Nesbit. We thank Dr. Alison Gould, Dr. Stanley Maloy and Dr. Kristen Marhaver for their  
481 contribution of strains or samples for this study. We thank Dr. Alyssa Demko, Dr. Jennifer  
482 Sneed, Dr. Jennifer Doudna, Dr. Valerie Paul and Dr. Benjamin Rubin for their feedback on the  
483 project and manuscript. Schematic figures were created in part using Biorender.com.

484

485 This work was supported by the National Science Foundation (2017232404, A.T.A.; 1942251,  
486 N.J.S.; OCE-1837116, B.S.M.), the Gordon and Betty Moore Foundation (GBMF9344 to N.J.S.;  
487 <https://doi.org/10.37807/GBMF9344>), Office of Naval Research (N00014-20-1-2120 to N.J.S.),  
488 the National Institutes of Health, NIGMS (R35GM146722 to N.J.S.; R01ES030316 to B.S.M.)  
489 and the Alfred P. Sloan Foundation, Sloan Research Fellowship (N.J.S.). A.T.A. and N.J.S. are  
490 coinventors on provisional U.S. patent application Serial number 63/323,653, entitled "Genetic  
491 Engineering of Marine Bacteria for Biomaterial Production, Probiotic Use in Aquaculture and  
492 Marine Environmental Restoration" and assigned to San Diego State University Research  
493 Foundation.



494       **REFERENCES**

- 495    1.    Prado S, Romalde JL, Barja JL. 2010. Review of probiotics for use in bivalve hatcheries.  
496        Vet Microbiol 145:187–197.
- 497    2.    D’Alvise PW, Lillebø S, Prol-Garcia MJ, Wergeland HI, Nielsen KF, Bergh Ø, Gram L.  
498        2012. *Phaeobacter gallaeciensis* reduces *vibrio anguillarum* in cultures of microalgae and  
499        rotifers, and prevents vibriosis in cod larvae. PLoS One 7:e43996.
- 500    3.    Peixoto RS, Rosado PM, Leite DC de A, Rosado AS, Bourne DG. 2017. Beneficial  
501        microorganisms for corals (BMC): Proposed mechanisms for coral health and resilience.  
502        Front Microbiol 8:341.
- 503    4.    Kracke F, Vassilev I, Krömer JO. 2015. Microbial electron transport and energy  
504        conservation - The foundation for optimizing bioelectrochemical systems. Front Microbiol  
505        6:575.
- 506    5.    Nozzi NE, Oliver JWK, Atsumi S. 2013. Cyanobacteria as a Platform for Biofuel  
507        Production. Front Bioeng Biotechnol 0:7.
- 508    6.    Peixoto RS, Voolstra CR, Sweet M, Duarte CM, Carvalho S, Villela H, Lunshof JE, Gram  
509        L, Woodhams DC, Walter J, Roik A, Hentschel U, Thurber RV, Daisley B, Ushijima B,  
510        Daffonchio D, Costa R, Keller-Costa T, Bowman JS, Rosado AS, Reid G, Mason CE,  
511        Walke JB, Thomas T, Berg G. 2022. Harnessing the microbiome to prevent global  
512        biodiversity loss. Nat Microbiol 1–10.
- 513    7.    Lozada M, Dionisi HM. 2015. Microbial Bioprospecting in Marine Environments.  
514        Springer Handb Mar Biotechnol 307–326.
- 515    8.    Paulsen SS, Strube ML, Bech PK, Gram L, Sonnenschein EC. 2019. Marine Chitinolytic  
516        *Pseudoalteromonas* Represents an Untapped Reservoir of Bioactive Potential. mSystems  
517        4.
- 518    9.    Madsen EL. 2011. Microorganisms and their roles in fundamental biogeochemical cycles.  
519        Curr Opin Biotechnol 22:456–464.
- 520    10.   McFall-Ngai M, Hadfield MG, Bosch TCG, Carey H V, Domazet-Lošo T, Douglas AE,  
521        Dubilier N, Eberl G, Fukami T, Gilbert SF, Hentschel U, King N, Kjelleberg S, Knoll AH,  
522        Kremer N, Mazmanian SK, Metcalf JL, Nealson K, Pierce NE, Rawls JF, Reid A, Ruby  
523        EG, Rumpho M, Sanders JG, Tautz D, Wernegreen JJ. 2013. Animals in a bacterial world,  
524        a new imperative for the life sciences. Proc Natl Acad Sci U S A.
- 525    11.   Paoli L, Ruscheweyh H-J, Forneris CC, Hubrich F, Kautsar S, Bhushan A, Lotti A,  
526        Clayssen Q, Salazar G, Milanese A, Carlström CI, Papadopoulou C, Gehrig D, Karasikov  
527        M, Mustafa H, Larralde M, Carroll LM, Sánchez P, Zayed AA, Cronin DR, Acinas SG,  
528        Bork P, Bowler C, Delmont TO, Gasol JM, Gossert AD, Kahles A, Sullivan MB, Wincker  
529        P, Zeller G, Robinson SL, Piel J, Sunagawa S. 2022. Biosynthetic potential of the global  
530        ocean microbiome. Nat 2022 6077917 607:111–118.
- 531    12.   Sunagawa S, Coelho LP, Chaffron S, Kultima JR, Labadie K, Salazar G, Djahanschiri B,  
532        Zeller G, Mende DR, Alberti A, Cornejo-Castillo FM, Costea PI, Cruaud C, D’Ovidio F,  
533        Engelen S, Ferrera I, Gasol JM, Guidi L, Hildebrand F, Kokoszka F, Lepoivre C, Lima-  
534        Mendez G, Poulain J, Poulos BT, Royo-Llonch M, Sarmiento H, Vieira-Silva S, Dimier C,

- 535 Picheral M, Searson S, Kandels-Lewis S, Boss E, Follows M, Karp-Boss L, Krzic U,  
536 Reynaud EG, Sardet C, Sieracki M, Velayoudon D, Bowler C, De Vargas C, Gorsky G,  
537 Grimsley N, Hingamp P, Iudicone D, Jaillon O, Not F, Ogata H, Pesant S, Speich S,  
538 Stemmann L, Sullivan MB, Weissenbach J, Wincker P, Karsenti E, Raes J, Acinas SG,  
539 Bork P. 2015. Structure and function of the global ocean microbiome. *Science* (80- ) 348.
- 540 13. Shetty RP, Endy D, Knight TF. 2008. Engineering BioBrick vectors from BioBrick parts.  
541 *J Biol Eng* 2:1–12.
- 542 14. Engler C, Kandzia R, Marillonnet S. 2008. A One Pot, One Step, Precision Cloning  
543 Method with High Throughput Capability. *PLoS One* 3:e3647.
- 544 15. Wiles TJ, Wall ES, Schlomann BH, Hay EA, Parthasarathy R, Guillemin K. 2018.  
545 Modernized tools for streamlined genetic manipulation and comparative study of wild and  
546 diverse proteobacterial lineages. *MBio* 9.
- 547 16. Vasudevan R, Gale GAR, Schiavon AA, Puzorjov A, Malin J, Gillespie MD, Vavitsas K,  
548 Zulkower V, Wang B, Howe CJ, Lea-Smith DJ, McCormick AJ. 2019. CyanoGate: A  
549 Modular Cloning Suite for Engineering Cyanobacteria Based on the Plant MoClo Syntax.  
550 *Plant Physiol* 180:39–55.
- 551 17. Leonard SP, Perutka J, Powell JE, Geng P, Richhart DD, Byrom M, Kar S, Davies BW,  
552 Ellington AD, Moran NA, Barrick JE. 2018. Genetic Engineering of Bee Gut Microbiome  
553 Bacteria with a Toolkit for Modular Assembly of Broad-Host-Range Plasmids. *ACS*  
554 *Synth Biol* 7:1279–1290.
- 555 18. Lee ME, DeLoache WC, Cervantes B, Dueber JE. 2015. A Highly Characterized Yeast  
556 Toolkit for Modular, Multipart Assembly. *ACS Synth Biol* 4:975–986.
- 557 19. Whitaker WR, Shepherd ES, Sonnenburg JL, Trehan I, Dominguez-Bello MG, Contreras  
558 M, Magris M, Hidalgo G, Baldassano RN, Anokhin AP, et Al. 2017. Tunable Expression  
559 Tools Enable Single-Cell Strain Distinction in the Gut Microbiome. *Cell* 169:538--  
560 546.e12.
- 561 20. Buijs Y;, Bech PK, Vazquez Albacete D, Bentzon-Tilia M;, Sonnenschein EC, Gram LC;,  
562 Zhang S-D; 2022. Marine Proteobacteria as a source of natural products: advances in  
563 molecular tools and strategies. *Nat Prod Rep* 36:1333–1350.
- 564 21. Vijayan N, Lema KA, Nedved BT, Hadfield MG. 2019. Microbiomes of the polychaete  
565 *Hydroides elegans* (Polychaeta: Serpulidae) across its life-history stages. *Mar Biol* 166:19.
- 566 22. Bourne DG, Dennis PG, Uthicke S, Soo RM, Tyson GW, Webster N. 2013. Coral reef  
567 invertebrate microbiomes correlate with the presence of photosymbionts. *ISME J* 2013 77  
568 7:1452–1458.
- 569 23. Stephens WZ, Burns AR, Stagaman K, Wong S, Rawls JF, Guillemin K, Bohannan BJM.  
570 2015. The composition of the zebrafish intestinal microbial community varies across  
571 development. *ISME J* 2016 103 10:644–654.
- 572 24. Bourne DG, Morrow KM, Webster NS. 2016. Insights into the Coral Microbiome:  
573 Underpinning the Health and Resilience of Reef Ecosystems. *Annu Rev Microbiol*  
574 70:317–340.
- 575 25. Bowman JP. 2007. Bioactive compound synthetic capacity and ecological significance of  
576 marine bacterial genus *Pseudoalteromonas*. *Mar Drugs* 5:220–241.

- 577 26. Maansson M, Vynne NG, Klitgaard A, Nybo JL, Melchiorson J, Nguyen DD, Sanchez  
578 LM, Ziemert N, Dorrestein PC, Andersen MR, Gram L. 2016. An Integrated Metabolomic  
579 and Genomic Mining Workflow To Uncover the Biosynthetic Potential of Bacteria.  
580 *mSystems* 1:e00028-15.
- 581 27. Offret C, Desriac F, Le Chevalier P, Mounier J, Jégou C, Fleury Y. 2016. Spotlight on  
582 antimicrobial metabolites from the marine bacteria *Pseudoalteromonas*: Chemodiversity  
583 and ecological significance. *Mar Drugs*.
- 584 28. Chau R, Pearson LA, Cain J, Kalaitzis JA, Neilan BA. 2021. A *Pseudoalteromonas* Clade  
585 with Remarkable Biosynthetic Potential. *Appl Environ Microbiol* 87:1–16.
- 586 29. Thøgersen MS, Delpin MW, Melchiorson J, Kilstrup M, Månsson M, Bunk B, Sprøer C,  
587 Overmann J, Nielsen KF, Gram L. 2016. Production of the bioactive compounds violacein  
588 and indolmycin is conditional in a *maeA* mutant of *Pseudoalteromonas luteoviolacea*  
589 S4054 lacking the malic enzyme. *Front Microbiol* 7:1–11.
- 590 30. Carpizo-Ituarte E, Hadfield MG. 1998. Stimulation of metamorphosis in the polychaete  
591 *Hydroides elegans* Haswell (Serpulidae). *Biol Bull* 194:14–24.
- 592 31. Huang S, Hadfield MG. 2003. Composition and density of bacterial biofilms determine  
593 larval settlement of the polychaete *Hydroides elegans*. *Mar Ecol Prog Ser* 260:161–172.
- 594 32. Unabia CRC, Hadfield MG. 1999. Role of bacteria in larval settlement and  
595 metamorphosis of the polychaete *Hydroides elegans*. *Mar Biol* 133:55–64.
- 596 33. Tran C, Hadfield MG. 2011. Larvae of *Pocillopora damicornis* (Anthozoa) settle and  
597 metamorphose in response to surface-biofilm bacteria. *Mar Ecol Prog Ser* 433:85–96.
- 598 34. Negri AP, Webster NS, Hill RT, Heyward AJ. 2001. Metamorphosis of broadcast  
599 spawning corals in response to bacteria isolated from crustose algae. *Mar Ecol Prog Ser*  
600 223:121–131.
- 601 35. Tebben J, Tapiolas DM, Motti CA, Abrego D, Negri AP, Blackall LL, Steinberg PD,  
602 Harder T. 2011. Induction of larval metamorphosis of the coral *Acropora millepora* by  
603 tetrabromopyrrole isolated from a *Pseudoalteromonas* bacterium. *PLoS One* 6:e19082.
- 604 36. Sneed JM, Sharp KH, Ritchie KB, Paul VJ. 2014. The chemical cue tetrabromopyrrole  
605 from a biofilm bacterium induces settlement of multiple Caribbean corals. *Proc R Soc B*  
606 *Biol Sci* 281.
- 607 37. Cavalcanti GS, Alker AT, Delherbe N, Malter KE, Shikuma NJ. 2020. The Influence of  
608 Bacteria on Animal Metamorphosis. *Annu Rev Microbiol* 74:137–158.
- 609 38. Shikuma NJ. 2021. Bacteria-Stimulated Metamorphosis: an Ocean of Insights from  
610 Investigating a Transient Host-Microbe Interaction. *mSystems* 6:e00754--21.
- 611 39. Huang Y, Callahan S, Hadfield MG. 2012. Recruitment in the sea: bacterial genes  
612 required for inducing larval settlement in a polychaete worm. *Sci Rep* 2.
- 613 40. Shikuma NJ, Pilhofer M, Weiss GL, Hadfield MG, Jensen GJ, Newman DK. 2014.  
614 Marine Tubeworm Metamorphosis Induced by Arrays of Bacterial Phage Tail-Like  
615 Structures. *Science* (80- ) 343:529–533.
- 616 41. Ericson CF, Eisenstein F, Medeiros JM, Malter KE, Cavalcanti GS, Zeller RW, Newman  
617 DK, Pilhofer M, Shikuma NJ. 2019. A contractile injection system stimulates tubeworm

- 618 metamorphosis by translocating a proteinaceous effector. *Elife* 8:1–19.
- 619 42. Malter KE, Esmerode M, Damba M, Alker AT, Forsberg EM, Shikuma NJ. 2022.  
620 Diacylglycerol, PKC and MAPK signaling initiate tubeworm metamorphosis in response  
621 to bacteria. *Dev Biol* 487:99–109.
- 622 43. Fürste JP, Pansegrau W, Frank R, Blöcker H, Scholz P, Bagdasarian M, Lanka E. 1986.  
623 Molecular cloning of the plasmid RP4 primase region in a multi-host-range tacP  
624 expression vector. *Gene* 48:119–131.
- 625 44. Meyer R. 2009. Replication and conjugative mobilization of broad host-range IncQ  
626 plasmids. *Plasmid* 62:57–70.
- 627 45. Ferrières L, Hémerly G, Nham T, Guérout AM, Mazel D, Beloin C, Ghigo JM. 2010.  
628 Silent mischief: Bacteriophage Mu insertions contaminate products of *Escherichia coli*  
629 random mutagenesis performed using suicidal transposon delivery plasmids mobilized by  
630 broad-host-range RP4 conjugative machinery. *J Bacteriol* 192:6418–6427.
- 631 46. Siebenlist U. 1979. Nucleotide sequence of the three major early promoters of  
632 bacteriophage T7. *Nucleic Acids Res* 6:1895–1907.
- 633 47. Jensen PR, Hammer K. 1998. The sequence of spacers between the consensus sequences  
634 modulates the strength of prokaryotic promoters. *Appl Environ Microbiol* 64:82–87.
- 635 48. Lee AK, Falkow S. 1998. Constitutive and Inducible Green Fluorescent Protein  
636 Expression in *Bartonella henselae*. *Infect Immun*.
- 637 49. Qi LS, Larson MH, Gilbert LA, Doudna JA, Weissman JS, Arkin AP, Lim WA. 2013.  
638 Repurposing CRISPR as an RNA-guided platform for sequence-specific control of gene  
639 expression. *Cell* 152:1173–1183.
- 640 50. Larson MH, Gilbert LA, Wang X, Lim WA, Weissman JS, Qi LS. 2013. CRISPR  
641 interference (CRISPRi) for sequence-specific control of gene expression. *Nat Protoc*  
642 8:2180–2196.
- 643 51. Balibar CJ, Walsh CT. 2006. In vitro biosynthesis of violacein from L-tryptophan by the  
644 enzymes VioA-E from *Chromobacterium violaceum*. *Biochemistry* 45:15444–15457.
- 645 52. Davis JJ, Wattam AR, Aziz RK, Brettin T, Butler R, Butler RM, Chlenski P, Conrad N,  
646 Dickerman A, Dietrich EM, Gabbard JL, Gerdes S, Guard A, Kenyon RW, MacHi D,  
647 Mao C, Murphy-Olson D, Nguyen M, Nordberg EK, Olsen GJ, Olson RD, Overbeek JC,  
648 Overbeek R, Parrello B, Pusch GD, Shukla M, Thomas C, Vanoeffelen M, Vonstein V,  
649 Warren AS, Xia F, Xie D, Yoo H, Stevens R. 2020. The PATRIC Bioinformatics  
650 Resource Center: Expanding data and analysis capabilities. *Nucleic Acids Res* 48:D606--  
651 D612.
- 652 53. Guindon S, Gascuel O. 2003. A Simple, Fast, and Accurate Algorithm to Estimate Large  
653 Phylogenies by Maximum Likelihood. *Syst Biol* 52:696–704.
- 654 54. Stamatakis A, Hoover P, Rougemont J. 2008. A Rapid Bootstrap Algorithm for the  
655 RAxML Web Servers. *Syst Biol* 57:758–771.
- 656 55. Shikuma NJ, Antoshechkin I, Medeiros JM, Pilhofer M, Newman DK, Medeiros JM,  
657 Pilhofer M, Newman DK. 2016. Stepwise metamorphosis of the tubeworm *Hydroides*  
658 *elegans* is mediated by a bacterial inducer and MAPK signaling. *Proc Natl Acad Sci*

- 659 113:10097–10102.
- 660 56. Busch J, Agarwal V, Schorn M, Machado H, Moore BS, Rouse GW, Gram L, Jensen PR.  
661 2019. Diversity and distribution of the *bmp* gene cluster and its Polybrominated products  
662 in the genus *Pseudoalteromonas*. *Environ Microbiol* 21:1575–1585.
- 663 57. Agarwal V, El Gamal AA, Yamanaka K, Poth D, Kersten RD, Schorn M, Allen EE,  
664 Moore BS. 2014. Biosynthesis of polybrominated aromatic organic compounds by marine  
665 bacteria. *Nat Chem Biol* 10:640–647.
- 666 58. Rocchi I, Ericson CF, Malter KE, Zargar S, Eisenstein F, Pilhofer M, Beyhan S, Shikuma  
667 NJ. 2019. A Bacterial Phage Tail-like Structure Kills Eukaryotic Cells by Injecting a  
668 Nuclease Effector. *Cell Rep* 28:295--301.e4.
- 669 59. Jiang F, Shen J, Cheng J, Wang X, Yang J, Li N, Gao N, Jin Q. 2022. N-terminal signal  
670 peptides facilitate the engineering of PVC complex as a potent protein delivery system.  
671 *Sci Adv* 8:2343.
- 672 60. Xu J, Ericson CF, Lien YW, Rutaganira FUN, Eisenstein F, Feldmüller M, King N,  
673 Pilhofer M. 2022. Identification and structure of an extracellular contractile injection  
674 system from the marine bacterium *Algoriphagus machipongonensis*. *Nat Microbiol* 2022  
675 73 7:397–410.
- 676 61. Freckelton M, Nedved BT. 2020. When does symbiosis begin? Bacterial cues necessary  
677 for metamorphosis in the marine polychaete *Hydroides elegans*, p. 1–15. *In Cellular*  
678 *Dialogues in the Holobiont*. CRC Press.
- 679 62. Aldred N, Nelson A. 2019. Microbiome acquisition during larval settlement of the  
680 barnacle *Semibalanus balanoides*. *Biol Lett* 15.
- 681 63. Gosselin LA, Qian PY. 1997. Can bacterivory alone sustain larval development in the  
682 polychaete *Hydroides elegans* and the barnacle *Balanus amphitrite*? *Mar Ecol Prog Ser*  
683 161:93–101.
- 684 64. Freckelton ML, Nedved BT, Hadfield MG. 2017. Induction of Invertebrate Larval  
685 Settlement; Different Bacteria, Different Mechanisms? *Sci Rep* 7:42557.
- 686 65. Petersen LE, Kellermann MY, Nietzer S, Schupp PJ. 2021. Photosensitivity of the  
687 Bacterial Pigment Cycloprodigiosin Enables Settlement in Coral Larvae—Light as an  
688 Understudied Environmental Factor. *Front Mar Sci* 8.
- 689 66. Neave MJ, Apprill A, Ferrier-Pagès C, Voolstra CR. 2016. Diversity and function of  
690 prevalent symbiotic marine bacteria in the genus *Endozoicomonas*. *Appl Microbiol*  
691 *Biotechnol* 100.
- 692 67. Neave MJ, Michell CT, Apprill A, Voolstra CR. 2017. *Endozoicomonas* genomes reveal  
693 functional adaptation and plasticity in bacterial strains symbiotically associated with  
694 diverse marine hosts. *Sci Rep* 7:1–12.
- 695 68. Pogoreutz C, Rådecker N, Cárdenas A, Gärdes A, Wild C, Voolstra CR. 2018. Dominance  
696 of *Endozoicomonas* bacteria throughout coral bleaching and mortality suggests structural  
697 inflexibility of the *Pocillopora verrucosa* microbiome. *Ecol Evol* 8:2240–2252.
- 698 69. Rosado PM, Leite DCA, Duarte GAS, Chaloub RM, Jospin G, Nunes da Rocha U, P.  
699 Saraiva J, Dini-Andreote F, Eisen JA, Bourne DG, Peixoto RS. 2019. Marine probiotics:

- 700 increasing coral resistance to bleaching through microbiome manipulation. ISME J  
701 13:921.
- 702 70. Li J, Yang Q, Dong J, Sweet M, Zhang Y, Liu C, Zhang Y, Tang X, Zhang W, Zhang S.  
703 2022. Microbiome Engineering: A Promising Approach to Improve Coral Health.  
704 Engineering <https://doi.org/10.1016/j.eng.2022.07.010>.
- 705 71. Damjanovic K, Blackall LL, Webster NS, Oppen MJH van. 2017. The contribution of  
706 microbial biotechnology to mitigating coral reef degradation. Microb Biotechnol 10:1236–  
707 1243.
- 708 72. Nyholm S V., McFall-Ngai MJ. 2021. A lasting symbiosis: how the Hawaiian bobtail  
709 squid finds and keeps its bioluminescent bacterial partner. Nat Rev Microbiol 10.
- 710 73. Visick KL, Stabb E V., Ruby EG. 2021. A lasting symbiosis: how *Vibrio fischeri* finds a  
711 squid partner and persists within its natural host. Nat Rev Microbiol 0123456789.
- 712 74. Gould AL, Dunlap P V. 2019. Shedding Light on Specificity: Population Genomic  
713 Structure of a Symbiosis Between a Coral Reef Fish and Luminous Bacterium. Front  
714 Microbiol 10:2670.
- 715 75. Zhang XH, He X, Austin B. 2020. *Vibrio harveyi*: a serious pathogen of fish and  
716 invertebrates in mariculture. Mar Life Sci Technol. Springer.
- 717 76. King RK, Flick Jr GJ, Pierson D, Smith SA, Boardman GD, Coale Jr CW. 2004.  
718 Identification of Bacterial Pathogens in Biofilms of Recirculating Aquaculture Systems. J  
719 Aquat Food Prod Technol 13:125–133.
- 720 77. Ushijima B, Videau P, Burger AH, Shore-Maggio A, Runyon CM, Sudek M, Aeby GS,  
721 Callahan SM. 2014. *Vibrio coralliilyticus* strain OCN008 is an etiological agent of acute  
722 montipora white syndrome. Appl Environ Microbiol 80:2102–2109.
- 723 78. Ushijima B, Richards GP, Watson MA, Schubiger CB, Häse CC. 2018. Factors affecting  
724 infection of corals and larval oysters by *Vibrio coralliilyticus*. PLoS One 13:e0199475.
- 725 79. Dittmann KK, Sonnenschein EC, Egan S, Gram L, Bentzon-Tilia M. 2019. Impact of  
726 *Phaeobacter inhibens* on marine eukaryote-associated microbial communities. Environ  
727 Microbiol Rep 11:401–413.
- 728 80. Bramucci AR, Labeeuw L, Orata FD, Ryan EM, Malmstrom RR, Case RJ. 2018. The  
729 bacterial symbiont *Phaeobacter inhibens* Shapes the life history of its algal host *emiliania*  
730 *huxleyi*. Front Mar Sci 5:188.
- 731 81. Majzoub ME, Beyersmann PG, Simon M, Thomas T, Brinkhoff T, Egan S. 2019.  
732 *Phaeobacter inhibens* controls bacterial community assembly on a marine diatom. FEMS  
733 Microbiol Ecol 95:60.
- 734 82. Luo H, Moran MA. 2014. Evolutionary Ecology of the Marine Roseobacter Clade.  
735 Microbiol Mol Biol Rev 78:573–587.
- 736 83. Moran MA, Belas R, Schell MA, González JM, Sun F, Sun S, Binder BJ, Edmonds J, Ye  
737 W, Orcutt B, Howard EC, Meile C, Palefsky W, Goesmann A, Ren Q, Paulsen I, Ulrich  
738 LE, Thompson LS, Saunders E, Buchan A. 2007. Ecological genomics of marine  
739 Roseobacters. Appl Environ Microbiol 73:4559–4569.
- 740 84. Tesdorpf JE, Geers AU, Strube ML, Gram L, Bentzon-Tilia M. 2022. Roseobacter Group

- 741 Probiotics Exhibit Differential Killing of Fish Pathogenic *Tenacibaculum* Species. Appl  
742 Environ Microbiol 88.
- 743 85. Sonnenschein EC, Jimenez G, Castex M, Gram L. 2021. The Roseobacter-Group  
744 Bacterium *Phaeobacter* as a Safe Probiotic Solution for Aquaculture. Appl Environ  
745 Microbiol 87:1–15.
- 746 86. Dittmann KK, Rasmussen BB, Melchiorson J, Sonnenschein EC, Gram L, Bentzon-Tilia  
747 M. 2020. Changes in the microbiome of mariculture feed organisms after treatment with a  
748 potentially probiotic strain of *Phaeobacter inhibens*. Appl Environ Microbiol 86.
- 749 87. Ruiz-Ponte C, Cilia V, Lambert C, Nicolas JL. 1998. Roseobacter gallaeciensis sp. nov., a  
750 new marine bacterium isolated from rearings and collectors of the scallop *Pecten*  
751 *maximus*. Int J Syst Bacteriol 48 Pt 2:537–542.
- 752 88. González JM, Kiene RP, Moran MA. 1999. Transformation of sulfur compounds by an  
753 abundant lineage of marine bacteria in the alpha-subclass of the class Proteobacteria. Appl  
754 Environ Microbiol 65:3810–3819.
- 755 89. Deogaygay X, Delherbe N, Shikuma NJ. 2021. Draft Genome Sequences of Two Bacteria  
756 from the Roseobacter Group. Microbiol Resour Announc 10.
- 757 90. Cavalcanti GS, Wasserscheid J, Dewar K, Shikuma NJ. 2020. Complete Genome  
758 Sequences of Two Marine Biofilm Isolates, *Leisingera* sp. nov. Strains 201A and 204H,  
759 Novel Representatives of the Roseobacter Group. Microbiol Resour Announc 9.
- 760 91. Godwin S, Bent E, Borneman J, Pereg L. 2012. The Role of Coral-Associated Bacterial  
761 Communities in Australian Subtropical White Syndrome of *Turbinaria mesenterina*. PLoS  
762 One 7:e44243.
- 763 92. Apprill A, Marlow HQ, Martindale MQ, Rappé MS. 2009. The onset of microbial  
764 associations in the coral *Pocillopora meandrina*. ISME J 2009 36 3:685–699.
- 765 93. Zhang Y, Yang Q, Zhang Y, Ahmad M, Ling J, Tang X, Dong J. 2021. Shifts in  
766 abundance and network complexity of coral bacteria in response to elevated ammonium  
767 stress. Sci Total Environ 768:144631.
- 768 94. Silva DP, Villela HDM, Santos HF, Duarte GAS, Ribeiro JR, Ghizellini AM, Vilela CLS,  
769 Rosado PM, Fazolato CS, Santoro EP, Carmo FL, Ximenes DS, Soriano AU, Rachid  
770 CTCC, Vega Thurber RL, Peixoto RS. 2021. Multi-domain probiotic consortium as an  
771 alternative to chemical remediation of oil spills at coral reefs and adjacent sites.  
772 Microbiome 9:1–19.
- 773 95. Alker AT, Hern NA, Ali MA, Baez MI, Baswell BC, Baxter BI, Blitz A, Calimlim TM,  
774 Chevalier CA, Eguia CA, Esparza T, Fuller AE, Gwynn CJ, Hedin AL, Johnson RA, Kaur  
775 M, Laxina RT, Lee K, Maguire PN, Martelino IF, Melendez JA, Navarro JJ, Navarro JN,  
776 Osborn JM, Padilla MR, Peralta ND, Pureza JLR, Rojas JJ, Romo TR, Sakha M, Salcedo  
777 GJ, Sims KA, Trieu TH, Niesman IR, Shikuma NJ. 2022. Draft Genome Sequence of  
778 *Nereida* sp. Strain MMG025, Isolated from Giant Kelp. Microbiol Resour Announc  
779 11:70–72.
- 780 96. Arahall DR, Pujalte MJ, Rodrigo-Torres L. 2016. Draft genomic sequence of *Nereida*  
781 *ignava* CECT 5292T, a marine bacterium of the family Rhodobacteraceae. Stand Genomic  
782 Sci 11:1–8.

- 783 97. Ashen JB, Goff LJ. 2000. Molecular and ecological evidence for species specificity and  
784 coevolution in a group of marine algal-bacterial symbioses. *Appl Environ Microbiol*  
785 66:3024–3030.
- 786 98. Egan S, Harder T, Burke C, Steinberg P, Kjelleberg S, Thomas T. 2013. The seaweed  
787 holobiont: understanding seaweed–bacteria interactions. *FEMS Microbiol Rev* 37:462–  
788 476.
- 789 99. Singh RP, Reddy CRK. 2014. Seaweed-microbial interactions: Key functions of seaweed-  
790 associated bacteria. *FEMS Microbiol Ecol* 88:213–230.
- 791 100. Hofer U. 2021. A probiotic for seaweed. *Nat Rev Microbiol* 19:618.
- 792 101. Gibson DG, Young L, Chuang R-Y, Venter JC, Hutchison CA, Smith HO. 2009.  
793 Enzymatic assembly of DNA molecules up to several hundred kilobases. *Nat Methods*  
794 6:343–345.
- 795 102. Wattam AR, Davis JJ, Assaf R, Boisvert S, Brettin T, Bun C, Conrad N, Dietrich EM,  
796 Disz T, Gabbard JL, Gerdes S, Henry CS, Kenyon RW, Machi D, Mao C, Nordberg EK,  
797 Olsen GJ, Murphy-Olson DE, Olson R, Overbeek R, Parrello B, Pusch GD, Shukla M,  
798 Vonstein V, Warren A, Xia F, Yoo H, Stevens RL. 2017. Improvements to PATRIC, the  
799 all-bacterial bioinformatics database and analysis resource center. *Nucleic Acids Res*  
800 45:D535–D542.
- 801 103. Davis JJ, Gerdes S, Olsen GJ, Olson R, Pusch GD, Shukla M, Vonstein V, Wattam AR,  
802 Yoo H. 2016. PATtyFams: Protein Families for the Microbial Genomes in the PATRIC  
803 Database. *Front Microbiol* 7:118.
- 804 104. Edgar RC. 2004. MUSCLE: Multiple sequence alignment with high accuracy and high  
805 throughput. *Nucleic Acids Res* 32:1792–1797.
- 806 105. Cock PJA, Antao T, Chang JT, Chapman BA, Cox CJ, Dalke A, Friedberg I, Hamelryck  
807 T, Kauff F, Wilczynski B, De Hoon MJL. 2009. Biopython: freely available Python tools  
808 for computational molecular biology and bioinformatics. *Bioinformatics* 25:1422–1423.
- 809 106. Katoh K, Standley DM. 2013. MAFFT Multiple Sequence Alignment Software Version 7:  
810 Improvements in Performance and Usability. *Mol Biol Evol* 30:772–780.
- 811 107. Stamatakis A. 2014. RAxML version 8: a tool for phylogenetic analysis and post-analysis  
812 of large phylogenies. *Bioinformatics* 30:1312–1313.
- 813 108. Nedved BT, Hadfield MG. 2009. *Hydroides elegans* (Annelida: Polychaeta): A Model for  
814 Biofouling Research. *Mar industrial biofouling* 4:203–217.
- 815 109. Nesbit KT, Shikuma N. Developmental staging of the complete life cycle of the model  
816 marine tubeworm *Hydroides elegans* <https://doi.org/10.1101/2022.10.24.513551>.
- 817 110. Alker AT, Delherbe N, Purdy TN, Moore BS, Shikuma NJ. 2020. Genetic examination of  
818 the marine bacterium *Pseudoalteromonas luteoviolacea* and effects of its metamorphosis-  
819 inducing factors. *Environ Microbiol* 22:4689–4701.
- 820 111. Yang C-S, Chen M-H, Arun AB, Chen CA, Wang J-T, Chen W-M. 2010.  
821 *Endozoicomonas montiporae* sp. nov., isolated from the encrusting pore coral *Montipora*  
822 *aequituberculata*. *Int J Syst Evol Microbiol* 60:1158–1162.
- 823 112. de Lorenzo V, Timmis KN. 1994. Analysis and construction of stable phenotypes in gram-



- 824 negative bacteria with Tn5- and Tn10-derived minitransposons. *Methods Enzymol*  
825 235:386–405.
- 826 113. Simon R, Prierer U, Pühler A. 1983. A Broad Host Range Mobilization System for In  
827 Vivo Genetic Engineering: Transposon Mutagenesis in Gram Negative Bacteria.  
828 *Bio/Technology* 1983 1:784–791.
- 829
- 830

831 **Table S1. List of strains used in this study.** MIC = minimum inhibitory concentration. Kan =  
 832 kanamycin. Str = streptomycin. NT = antibiotic sensitivity not tested.  
 833

| Strain no. | Strain                                                   | Genotype                                                                        | Class | Order                    | MIC Kan (µg/mL) | Source        |
|------------|----------------------------------------------------------|---------------------------------------------------------------------------------|-------|--------------------------|-----------------|---------------|
| NJS005     | <i>Pseudoalteromonas luteoviolacea</i> HI1               | StrR                                                                            | Gamma | <i>Alteromonadales</i>   | 200             | (39)          |
| NJS023     | <i>Pseudoalteromonas luteoviolacea</i> HI1               | StrR, Δ <i>macB</i>                                                             | Gamma | <i>Alteromonadales</i>   | NT              | (40)          |
| NJS017     | <i>Pseudoalteromonas luteoviolacea</i> HI1               | StrR, Δ <i>vioA</i>                                                             | Gamma | <i>Alteromonadales</i>   | NT              | This study    |
| NJS595     | <i>Pseudoalteromonas</i> sp. PS5 Wild type               |                                                                                 | Gamma | <i>Alteromonadales</i>   | NT              | (36)          |
| NJS597     | <i>Pseudoalteromonas</i> sp. PS5 StrR                    |                                                                                 | Gamma | <i>Alteromonadales</i>   | 200             | This study    |
| NJS445     | <i>Vibrio harveyi</i>                                    | Wild type                                                                       | Gamma | <i>Vibrionales</i>       | NT              | Stanley Maloy |
| NJS675     | <i>Vibrio harveyi</i>                                    | StrR                                                                            | Gamma | <i>Vibrionales</i>       | 200             | This study    |
| MT002      | <i>Photobacterium mandapamensis</i> svers.3.2            | Wild type                                                                       | Gamma | <i>Vibrionales</i>       | 400             | Alison Gould  |
| NJS662     | <i>Endozoicomonas montiporae</i> CL-33                   | Wild type                                                                       | Gamma | <i>Oceanospirillales</i> | 100             | (111)         |
| NJS775     | <i>Cobetia</i> sp. MMG027                                | Wild type                                                                       | Alpha | <i>Oceanospirillales</i> | 200             | This study    |
| NJS302     | <i>Shimia</i> sp. MMG029                                 | Wild type                                                                       | Alpha | <i>Rhodobacterales</i>   | 300             | This study    |
| NJS409     | <i>Ruegeria pomeroyi</i> DSS-3                           | Wild type                                                                       | Alpha | <i>Rhodobacterales</i>   | 300             | (88)          |
| NJS491     | <i>Phaeobacter</i> sp. HS012                             | Wild type                                                                       | Alpha | <i>Rhodobacterales</i>   | 300             | (89)          |
| NJS408     | <i>Phaeobacter gallaeciensis</i> ATCC 700781 (DSM 26640) | Wild type                                                                       | Alpha | <i>Rhodobacterales</i>   | 300             | (87)          |
| NJS412     | <i>Phaeobacter gallaeciensis</i> ATCC 700781 (DSM 26640) | StrR                                                                            | Alpha | <i>Rhodobacterales</i>   | 300             | This Study    |
| NJS204     | <i>Leisingera</i> sp. 204H                               | Wild type                                                                       | Alpha | <i>Rhodobacterales</i>   | 200             | (90)          |
| NJS339     | <i>Leisingera</i> sp. 204H                               | StrR                                                                            | Alpha | <i>Rhodobacterales</i>   | 200             | This Study    |
| NJS678     | <i>Nereida</i> sp. MMG025                                | Wild type                                                                       | Alpha | <i>Rhodobacterales</i>   | 200             | (95)          |
| Strain no. | Strain                                                   | Genotype                                                                        |       |                          |                 | Source        |
| pNJS488    | <i>Escherichia coli</i> S17-1pir                         | TpR SmR recA thi pro (rK- mK+) RP4: 2-Tc:Mu Km Tn7 λpir                         |       |                          |                 | (112)         |
| NJS604     | <i>Escherichia coli</i> MFDpir                           | MG1655 RP4-2-Tc::[ΔMu1::aac(3)IV-ΔaphA-Δnic35-ΔMu2::zeo] ΔdapA::(erm-pir) ΔrecA |       |                          |                 | (45)          |
| pNJS033    | <i>Escherichia coli</i> SM10pir                          | thi thr leu tonA lacY supE recA::RP4-2-Tc::Mu Km λpir                           |       |                          |                 | (113)         |

834  
 835

836 **Table S2. List of plasmids used in this study.** N/A = 5' or 3' restriction site not applicable.  
 837 Amp = ampicillin. Kan = kanamycin. Str = streptomycin.  
 838

| Plasmid | Type             | 5' Site | 3' Site | Description                            | Marker | Origin  | Source     |
|---------|------------------|---------|---------|----------------------------------------|--------|---------|------------|
| pBTK001 | Entry vector     | N/A     | N/A     | Entry vector for generating new parts  | CamR   | p15A    | (17)       |
| pYTK008 | Connector        | 1       | 1       | ConLS' connector                       | CamR   | ColE1   | (18)       |
| pBTK107 | Promoter         | 2       | 2       | CP25 promoter, RBS                     | CamR   | ColE1   | (17)       |
| pBTK121 | Promoter         | 2       | 2       | PA3 promoter, RBS                      | CamR   | p15A    | (17)       |
| pMMK201 | Promoter         | 2       | 2       | ptac promoter, RBS                     | CamR   | ColE1   | This study |
| pMMK202 | Promoter         | 2       | 2       | HI1 macB promoter, RBS                 | CamR   | ColE1   | This study |
| pMMK203 | Promoter         | 2       | 2       | HI1 macsS promoter, RBS                | CamR   | ColE1   | This study |
| pYTK047 | GFP Dropout      | 2       | 4       | gfp dropout (internal Bsal sites)      | CamR   | ColE1   | (18)       |
| pBTK205 | Coding sequence  | 3       | 3       | gfp optim-1                            | CamR   | ColE1   | (17)       |
| pYTK034 | Coding sequence  | 3       | 3       | mRuby2                                 | CamR   | ColE1   | (18)       |
| pBTK206 | Coding sequence  | 3       | 3       | Nanoluc                                | CamR   | ColE1   | (17)       |
| pBTK305 | Terminator       | 4       | 4       | T7 terminator                          | CamR   | ColE1   | (17)       |
| pYTK073 | Connector        | 5       | 5       | ConRE' connector                       | CamR   | ColE1   | (18)       |
| pBTK402 | Origin, Marker   | 8       | 8       | mRFP1 dropout                          | KanR   | RSF1010 | (17)       |
| pBTK527 | Origin, Marker   | ConLS'  | ConRE'  | BsmBI sites flanking spacer            | KanR   | RSF1010 | (17)       |
| pBTK614 | dCas9            | ConL1   | ConRE   | dead cas9                              | AmpR   | ColE1   | (17)       |
| pMMK601 | dCas9-bla        | ConL1   | ConRE   | dead cas9 with amp resistance gene     | AmpR   | ColE1   | This study |
| pBTK615 | sgRNA            | ConLS   | ConR1   | sgRNA targeting gfp                    | AmpR   | ColE1   | (17)       |
| pMMK602 | ptac sgRNA       | ConLS   | ConR1   | sgRNA targeting gfp driven by ptac     | AmpR   | ColE1   | This study |
| pMMK603 | VioA sgRNA       | ConLS   | ConR1   | sgRNA targeting PL vioA driven by ptac | AmpR   | ColE1   | This study |
| pMMK604 | macB sgRNA       | ConLS   | ConR1   | sgRNA targeting PL macB driven by ptac | AmpR   | ColE1   | This study |
| pMMK809 | Stage 1 assembly | 1       | 5       | pBTK402-PA3-Nluc-T7                    | KanR   | RSF1010 | (17)       |
| pMMK810 | Stage 1 assembly | 1       | 5       | pBTK402-CP25-Nluc-T7                   | KanR   | RSF1010 | (17)       |
| pMMK811 | Stage 1 assembly | 1       | 5       | pBTK402-Ptac-Nluc-T7                   | KanR   | RSF1010 | This study |

|         |                     |     |     |                                  |           |              |               |
|---------|---------------------|-----|-----|----------------------------------|-----------|--------------|---------------|
| pMMK812 | Stage 1<br>assembly | 1   | 5   | pBTK402-macBp-<br>Nluc-T7        | KanR      | RSF1010      | This<br>study |
| pMMK813 | Stage 1<br>assembly | 1   | 5   | pBTK402-macSp-<br>Nluc-T7        | KanR      | RSF1010      | This<br>study |
| pMMK814 | Stage 1<br>assembly | 1   | 5   | pBTK402-CP25-gfp-<br>T7          | KanR      | RSF1010 (17) |               |
| pMMK815 | Stage 1<br>assembly | N/A | N/A | pCRISPRi-dCas9-<br>bla-Ptac-gfp  | KanR/AmpR | RSF1010      | This<br>study |
| pMMK816 | Stage 1<br>assembly | N/A | N/A | pCRISPRi-dCas9-<br>bla-Ptac-vioA | KanR/AmpR | RSF1010      | This<br>study |
| pMMK817 | Stage 1<br>assembly | N/A | N/A | pCRISPRi-dCas9-<br>bla-Ptac-macB | KanR/AmpR | RSF1010      | This<br>study |

839

840

841 **Table S3. List of Primers used in this study.**  
842

| <b>Primer</b>                       | <b>Sequence</b>                                                                  |
|-------------------------------------|----------------------------------------------------------------------------------|
| p107_bbamp_F                        | TATGTGAGACCAGACCAATAAAAA                                                         |
| p107_bbamp_R                        | CGTTTGAGACCGACTACGGTTA                                                           |
| macb_seq_f                          | ATGAGCCGAGAATTATCCTTGAG                                                          |
| sheath_seq_f                        | CATGGCGTCATAGCAGTACA                                                             |
| ptac_gbsn_F2                        | TAACCGTAGTCGGTCTCAAACGGCACTCCCCTTCTGGATAAT                                       |
| ptac_gbsn_R2                        | TTTTTATTGGTCTGGTCTCACATAGGGACAACCTCCAGTGAAAAG                                    |
| pBTK615_ptac_macB1_sgRNA_F          | TCGGCTCGTATAATGTGTGGAAGCTCGGGGATCTGTCGTG                                         |
| pBTK615_ptac_macB1_sgRNA_R          | TTTTAACTTGCTATTTCTAGCTCTAAAACCGACAGATCCCCGAGCTT                                  |
| pBTK107_macB_promoter_gbsn_F<br>1   | GATAACCGTAGTCGGTCTCAAACGGAAGTTTCTGCGGTGCTTTT                                     |
| pBTK107_macB_promoter_gbsn_<br>R1   | TTTTTATTGGTCTGGTCTCACATAAGATTACCTTATTAATGTTATTAATGAG<br>CAT                      |
| pBTK107_sheath_promoter_gbsn_<br>F1 | GATAACCGTAGTCGGTCTCAAACGACACCGACTTTACCCTATCTCG                                   |
| pBTK107_sheath_promoter_gbsn_<br>R1 | TTTTTATTGGTCTGGTCTCACATAGTTTTTTCCTTACGTTGATAATTACATTC                            |
| pBTK107_CP25_F                      | TGAGGGGGCTGGTATAATCA                                                             |
| gRNA_VioA5_F                        | CACATATTTATGTTCAAACTCGAAG                                                        |
| pBTK615_ptac_seqF1                  | ACAGACACTGCGACAACGTG                                                             |
| pBTK615_gRNA_GFP                    | CGTCTAATTCCACGAGGATTG                                                            |
| p615_ptac_gRNA_VioA5_F2             | TCGGCTCGTATAATGTGTGGTTTATGTTCAAACTCGAA                                           |
| p615_ptac_gRNA_VioA5_R2             | TTTTAACTTGCTATTTCTAGCTCTAAAACCTTCGAGTTTATGAACATAAA                               |
| p615_ptac_vector_amplification_R    | CCACACATTATACGAGCCGA                                                             |
| p615_vector_amplification_F         | GTTTTAGAGCTAGAAATAGCAAGTTAAAA                                                    |
| p615-ptac_F2                        | CAATTAATCATCGGCTCGTATAATGTGTGGCGTCTAATTCCACGAGGATTG                              |
| p615-ptac_R2                        | TACGAGCCGATGATTAATTGTCAACAGCTCTTCAGTGAGACGGTATTGCG                               |
| 61A2_Kan_intF2                      | CTGCCTCGGTGAGTTTTCTC<br>CTTTTCTACGGGGTCTGACGCGTCTCATGCTCCTCAGTGAACGAAAAC<br>CACG |
| 61C9_p614-bla_R1                    |                                                                                  |
| 61D1_p614-bla_F1                    | GTGAACACTCTCCCGGCTGAAATCTGCTCGTCAGTGGTG                                          |
| 61D2_p614-bsmBI_R1                  | GACGCGTCTCATGCTCCT                                                               |
| 61D2_p614-bsmBI_F1                  | CTCCCGGCTGAAATCTGC                                                               |
| 62B5_pBTK107_seq_F                  | TGGATAACCGTAGTCGGTCTC                                                            |
| 62B6_pBTK107_seq_R                  | GGATTTGTTCAAGAACGCTCGGTT                                                         |

843
